# Supplementary material
Source: PubMed Central journal article supplement (PMC3977183)

Fig s1.

(A)

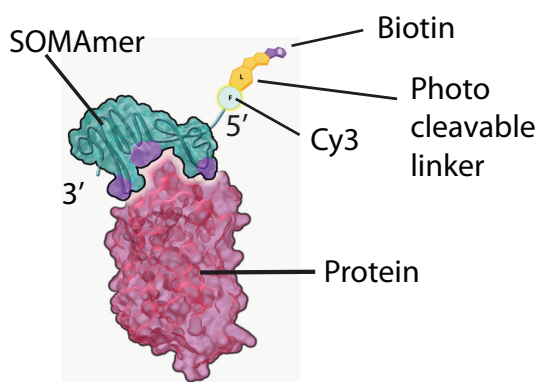

(B)

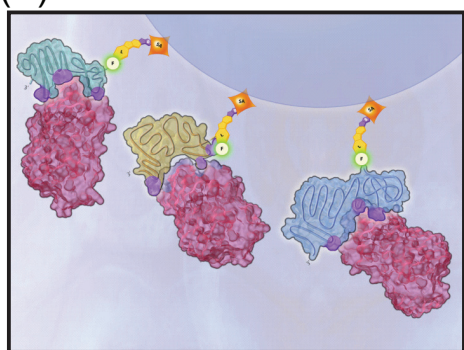

(C)

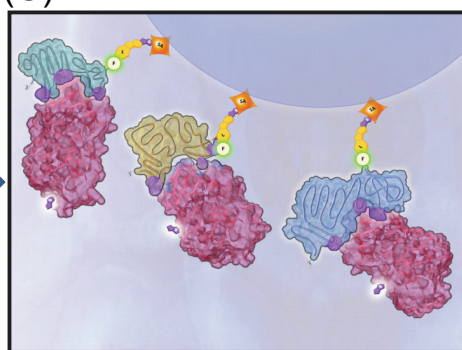

(E)

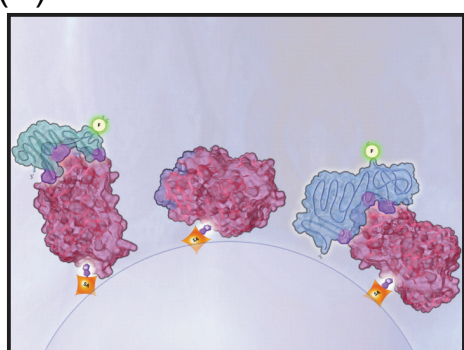

(D)

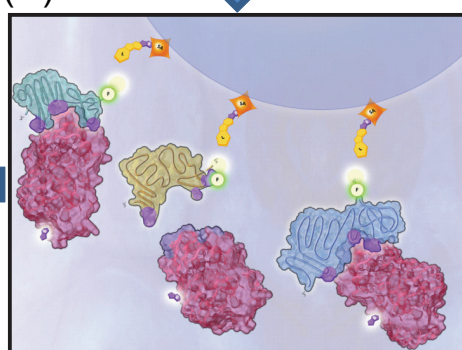

(F)

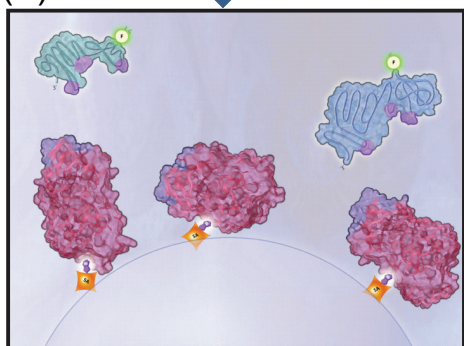

(G)

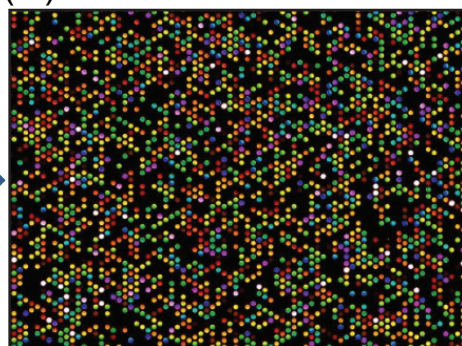

Supplement: supp_M113.032136_mcp.M113.032136-1.pdf [file supp_M113.032136_mcp.M113.032136-1.pdf]

Fig s2

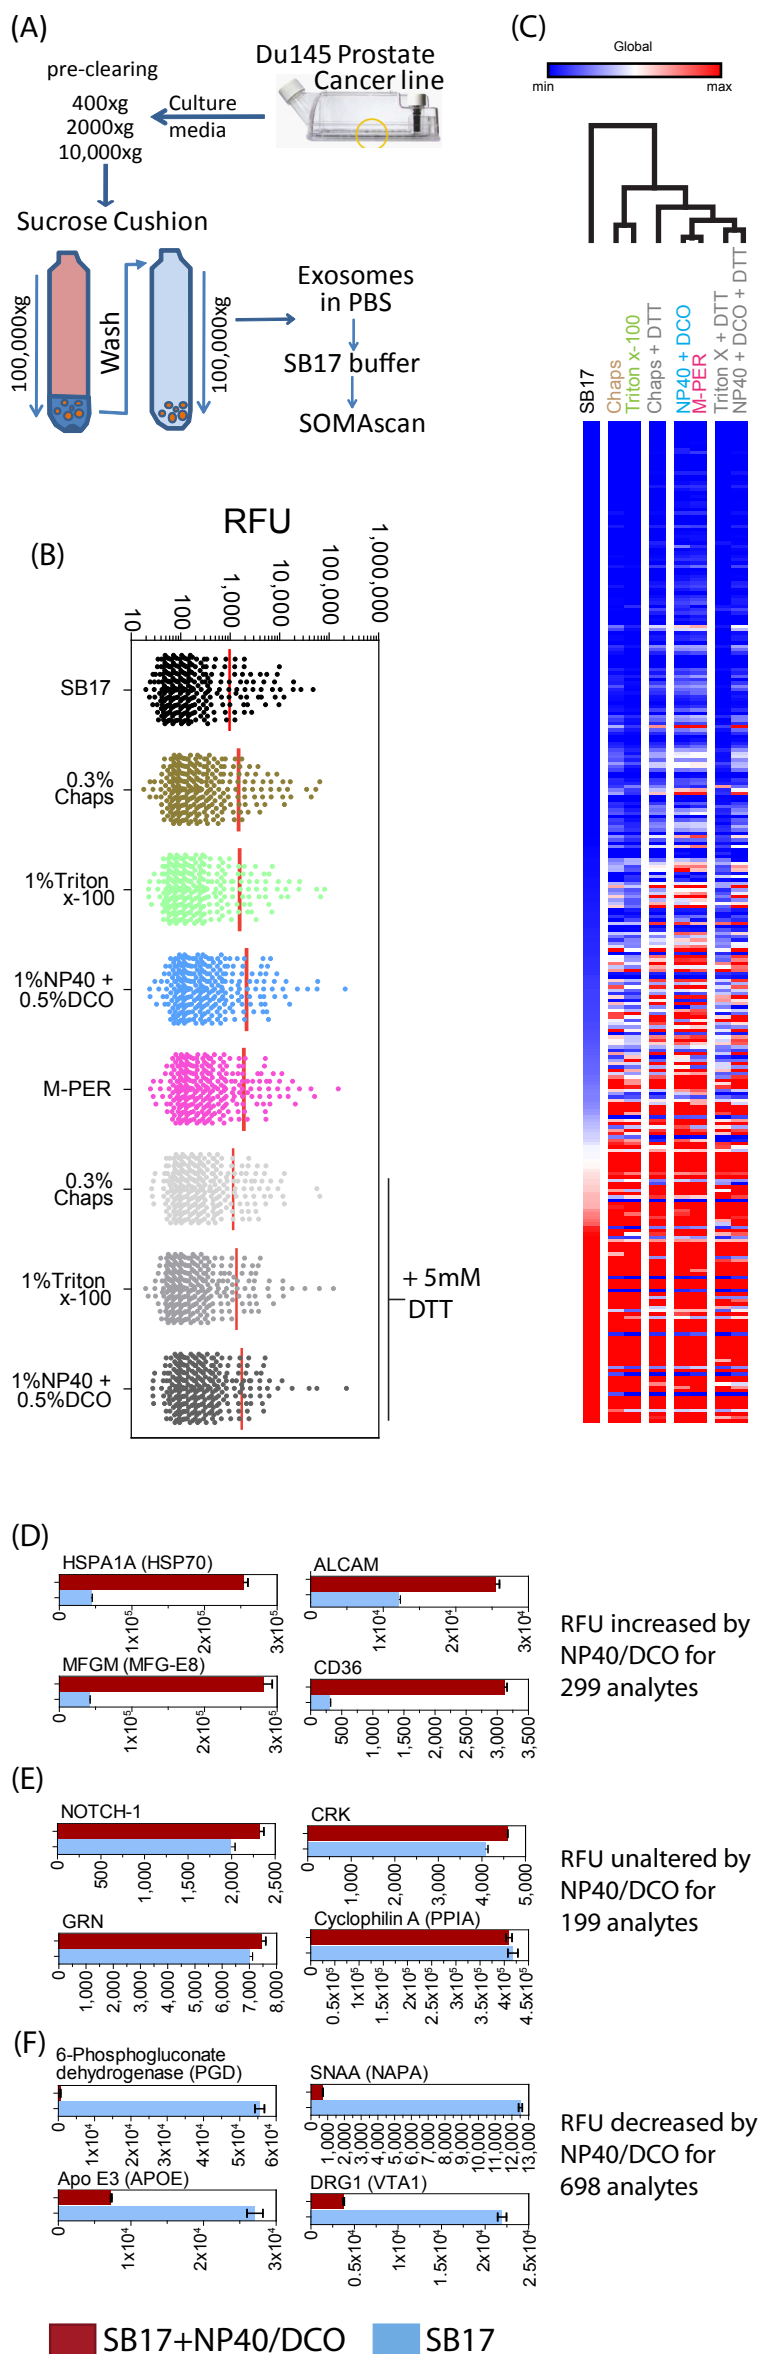

Supplement: supp_M113.032136_mcp.M113.032136-2.pdf [file supp_M113.032136_mcp.M113.032136-2.pdf]

Fig S4

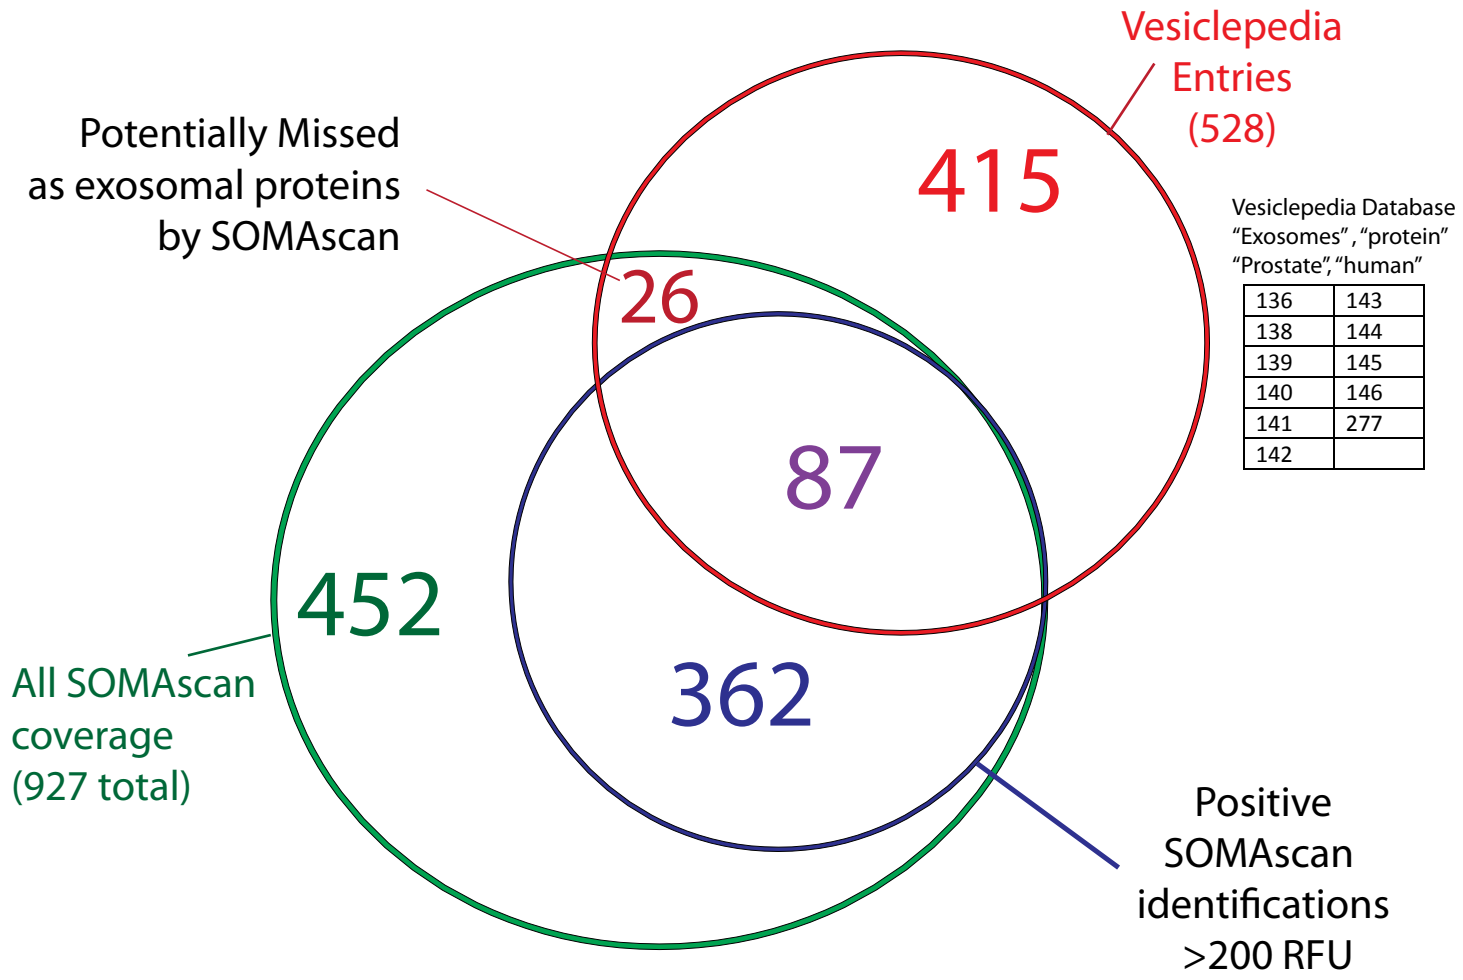

Supplement: supp_M113.032136_mcp.M113.032136-4.pdf [file supp_M113.032136_mcp.M113.032136-4.pdf]
